1 **Dependence of the stimulus-driven microsaccade rate signature on**  
2 **visual stimulus polarity**

3  
4 Tatiana Malevich<sup>1,2,3\*</sup>, Antimo Buonocore<sup>1,2</sup>, & Ziad M. Hafed<sup>1,2</sup>

5  
6 <sup>1</sup>Werner Reichardt Centre for Integrative Neuroscience, Tuebingen University, Tuebingen, Germany  
7 72076

8 <sup>2</sup>Hertie Institute for Clinical Brain Research, Tuebingen University, Tuebingen, Germany 72076

9 <sup>3</sup>Graduate School of Neural and Behavioural Sciences, International Max-Planck Research School,  
10 Tuebingen University, Tuebingen, Germany 72076  
11

12 \* Correspondence to:

13 [tatiana.malevich@cin.uni-tuebingen.de](mailto:tatiana.malevich@cin.uni-tuebingen.de)

14  
15 **Abbreviated title:**

16 Black versus white stimulus onset effects on microsaccades

17  
18 **Corresponding author address:**

19 Tatiana Malevich  
20 Werner Reichardt Centre for Integrative Neuroscience  
21 and  
22 Hertie Institute for Clinical Brain Research  
23 Otfried-Mueller Str. 25  
24 Tuebingen, 72076  
25 Germany  
26 Phone: +49 7071 29 88821  
27  
28  
29

30

## Abstract

31 Microsaccades have a steady rate of occurrence during maintained gaze fixation,  
32 which gets transiently modulated by abrupt sensory stimuli. Such modulation,  
33 characterized by a rapid reduction in microsaccade frequency followed by a stronger  
34 rebound phase of high microsaccade rate, is often described as the microsaccadic rate  
35 signature, owing to its stereotyped nature. Here we investigated the impacts of  
36 stimulus polarity (luminance increments or luminance decrements relative to  
37 background luminance) and size on the microsaccadic rate signature. We presented  
38 brief visual flashes consisting of large or small white or black stimuli over an otherwise  
39 gray image background. Both large and small stimuli caused robust early  
40 microsaccadic inhibition, but only small ones caused a subsequent increase in  
41 microsaccade frequency above baseline microsaccade rate. Critically, small black  
42 stimuli were always associated with stronger modulations in microsaccade rate after  
43 stimulus onset than small white stimuli, particularly in the post-inhibition rebound phase  
44 of the microsaccadic rate signature. Because small stimuli were also associated with  
45 expected direction oscillations to and away from their locations of appearance, these  
46 stronger rate modulations in the rebound phase meant higher likelihoods of  
47 microsaccades opposite the black flash locations relative to the white flash locations.  
48 Our results demonstrate that the microsaccadic rate signature is sensitive to stimulus  
49 polarity, and they point to dissociable neural mechanisms underlying early  
50 microsaccadic inhibition after stimulus onset and later microsaccadic rate rebound at  
51 longer times thereafter. These results also demonstrate early access of oculomotor  
52 control circuitry to sensory representations, particularly for momentarily inhibiting  
53 saccade generation.

54

55

56

57 **Keywords**

58 Microsaccades; fixational eye movements; off responses; on responses; cueing;

59 saccadic inhibition

60

61

## **New and noteworthy**

62 Microsaccades are small saccades that occur during gaze fixation. Microsaccade rate  
63 is transiently reduced after sudden stimulus onsets, and then strongly rebounds before  
64 returning to baseline. We explored the influence of stimulus polarity (black versus  
65 white) on this “rate signature”. We found that small black stimuli cause stronger  
66 microsaccadic modulations than white ones, but primarily in the rebound phase. This  
67 suggests dissociated neural mechanisms for microsaccadic inhibition and subsequent  
68 rebound in the microsaccadic rate signature.

## 69 **Introduction**

70 Microsaccades occur occasionally during steady-state gaze fixation. When an  
71 unexpected stimulus onset occurs under such steady-state conditions, as is the case  
72 in a variety of behavioral experiments requiring maintained fixation (Hafed et al.  
73 2015), stereotyped changes in microsaccade likelihood (and other properties) are  
74 known to take place. Specifically, microsaccade likelihood, or rate per second,  
75 abruptly decreases shortly after stimulus onset, remains near zero for a brief period  
76 of time, and then momentarily rebounds to higher rates than before stimulus onset  
77 (Bonneh et al. 2015; Buonocore et al. 2017a; Engbert and Kliegl 2003; Hafed and  
78 Ignashchenkova 2013; Laubrock et al. 2005; Peel et al. 2016; Rolfs et al. 2008; Tian  
79 et al. 2018; Valsecchi et al. 2007; White and Rolfs 2016). This pattern has been  
80 termed the “microsaccadic rate signature” (Engbert and Kliegl 2003; Hafed and  
81 Ignashchenkova 2013; Rolfs 2009; Rolfs et al. 2008; Scholes et al. 2015), owing to  
82 its highly repeatable nature across many paradigms, and it is also related to the more  
83 general phenomenon of saccadic inhibition reported for larger saccades (Bompas  
84 and Sumner 2011; Buonocore and McIntosh 2008; Buonocore et al. 2016; Edelman  
85 and Xu 2009; Reingold and Stampe 1999; 2004; 2002; 2003).

86  
87 The neural mechanisms behind the microsaccadic rate signature, and saccadic  
88 inhibition in general, are still being investigated. Neurophysiological perturbation  
89 studies in the superior colliculus (SC), frontal eye fields (FEF), and primary visual  
90 cortex (V1) have resulted in initial informative steps towards clarifying these  
91 mechanisms. First, using a paradigm involving peripheral stimulus onsets, Hafed and  
92 colleagues demonstrated that monkeys exhibit the same microsaccadic rate  
93 signature as humans (Hafed et al. 2011). These effects persisted even after  
94 thousands of trials performed by the same animals in the same tasks, confirming the

95 systematic nature of the effects. These authors then exploited the observation that  
96 monkeys exhibit the same phenomenon as humans to perform invasive  
97 neurophysiology; they reversibly inactivated portions of the SC topographic map  
98 representing the locations of the appearing peripheral stimuli (Hafed et al. 2013). The  
99 microsaccadic rate signature was virtually unaltered, whereas microsaccade  
100 directions were significantly redistributed (Hafed et al. 2013), consistent with a  
101 dissociation between the microsaccade rate signature and microsaccade direction  
102 oscillations after stimulus onsets (Buonocore et al. 2017a; Hafed and  
103 Ignashchenkova 2013; Tian et al. 2016). In follow up work, Peel and colleagues  
104 extended these results by reversibly inactivating the FEF. They found that the early  
105 inhibition was again unaltered, but, critically, the rebound phase of the microsaccadic  
106 rate signature was affected (Peel et al. 2016); there were fewer post-inhibition  
107 microsaccades than without FEF inactivation. In V1, lesions were found to affect  
108 microsaccades in general, but the early inhibition after stimulus onset was generally  
109 still present (Yoshida and Hafed 2017). Together with computational modeling (Hafed  
110 and Ignashchenkova 2013; Tian et al. 2016), all of these initial results suggest that  
111 there may be different components associated with the rate signature (e.g. inhibition  
112 versus rebound) that are mediated by distinct neural circuits; the early inhibition is  
113 clearly distinct from the later rebound that seems to particularly require frontal cortical  
114 control.

115  
116 That said, the microsaccadic rate signature in its entirety must be related to early  
117 sensory responses, since the inhibition phase starts with very short latencies from  
118 stimulus onset (approximately 60-70 ms in monkeys) (Hafed et al. 2011; Malevich et  
119 al. 2020; Tian et al. 2018). It is, therefore, worthwhile to explore the effects of  
120 stimulus properties on subsequent microsaccadic modulations. For example, Rolfs

121 and colleagues investigated the impacts of luminance and color contrast, as well as  
122 auditory stimulation, on microsaccadic inhibition (Rolfs et al. 2008; White and Rolfs  
123 2016). Similarly, contrast sensitivity was related to the microsaccadic rate signature  
124 in other recent studies (Bonneh et al. 2015; Scholes et al. 2015). In all of these  
125 investigations, the general finding was that the strength of both inhibition and  
126 subsequent rebound increases with increasing stimulus strength. This suggests that  
127 expected sensory neuron properties (e.g. increased neural activity with increased  
128 stimulus contrast) must act rapidly on the oculomotor system to mediate inhibition,  
129 and potentially also influence subsequent rate rebounds. Here, we add to such  
130 existing descriptive studies about the microsaccadic rate signature. We document  
131 new evidence that visual stimulus polarity matters. We presented localized as well as  
132 diffuse visual flashes that were either white or black, relative to an otherwise gray  
133 background. We found that black localized stimuli were particularly effective in  
134 modulating the microsaccadic rate signature when compared to white stimuli,  
135 especially in the rebound phase, even when the white stimuli had higher contrast  
136 relative to the background.

137  
138 Besides helping to clarify the properties of sensory pathways affecting the  
139 microsaccadic rate signature, our results are additionally important because of  
140 existing links between the rate signature and spatial attention shifts (Engbert and  
141 Kliegl 2003; Hafed 2013; Hafed et al. 2015; Hafed and Clark 2002; Tian et al. 2018;  
142 2016). Despite accumulated evidence on differential effects of stimulus contrast on  
143 both so-called facilitatory and inhibitory cueing effects and on reaction times in  
144 general (Hawkins et al. 1988; Hughes 1984; Kean and Lambert 2003; Reuter-Lorenz  
145 et al. 1996), the question of whether and to what extent stimulus polarity itself affects  
146 cueing effects, to our knowledge, has not been explicitly addressed. This question

147 might be of special interest, since “darks” / “blacks” seem to have temporal and  
148 sensitivity advantages over “whites” in visual perception, and there are perceptual  
149 asymmetries in processing of low and high luminances (Chubb and Nam 2000;  
150 Komban et al. 2011; Komban et al. 2014; Lu and Sperling 2012). Stimulus polarity  
151 can also activate distinct neural pathways as early as the retina through ON and OFF  
152 retinal image processing pathways (Chichilnisky and Kalmar 2002; Jin et al. 2011;  
153 Komban et al. 2011; Komban et al. 2014; Nichols et al. 2013; Xing et al. 2010; Yeh et  
154 al. 2009). Because we believe that microsaccades can potentially play an integral  
155 role in cognitive processes like covert attention (Chen et al. 2015; Hafed 2013; Hafed  
156 et al. 2015; Hafed and Clark 2002; Tian et al. 2018; 2016), we believe that knowing  
157 more about the stimulus conditions (and pathways) that might maximize or minimize  
158 the likelihood of microsaccades in a given paradigm would be useful in cognitive and  
159 systems neuroscience in general.

160

161



## 162 **Methods**

### 163 *Ethics approvals*

164 All monkey experiments were approved by ethics committees at the  
165 Regierungspräsidium Tübingen. The experiments were in line with the European  
166 Union directives and the German laws governing animal research.

167

### 168 *Laboratory setups*

169 Monkey experiments were performed in the same laboratory environment as that  
170 described recently (Buonocore et al. 2019; Malevich et al. 2020; Skinner et al. 2019).

171 A subset of the data (full-screen flash condition described below) were analyzed in  
172 brief in (Malevich et al. 2020), in order to compare the timing of microsaccadic  
173 inhibition to the novel ocular position drift phenomenon described in that study.

174 However, the present study describes new analyses and comparisons to different  
175 stimulus conditions that are not reported on in the previous study.

176

177 The monkeys viewed stimuli on a cathode-ray-tube (CRT) display running at 120 Hz  
178 refresh rate. The display was gamma-corrected (linearized), and the stimuli were  
179 grayscale. Background and stimulus luminance values are described below with the  
180 behavioral tasks. Stimulus control was achieved using the Psychophysics Toolbox  
181 (Brainard 1997; Kleiner et al. 2017; Pelli 1997). The toolbox acted as a slave device  
182 receiving display update commands from a master device and sending back  
183 confirmation of display updates. The master system consisted of a real-time  
184 computer from National Instruments controlling all aspects of data acquisition  
185 (including digitization of eye position signals) and reward of the animals (in addition  
186 to display control). The real-time computer communicated with the Psychophysics

187 Toolbox using direct Ethernet connections and universal data packet (UDP) protocols  
188 (Chen and Hafed 2013).

189

### 190 *Animal preparation*

191 We collected behavioral data from 2 adult, male rhesus macaques (*Macaca Mulatta*).  
192 Monkeys M and A (aged 7 years, and weighing 9-10 kg) were implanted with a  
193 scleral coil in one eye to allow measuring eye movements (sampled at 1KHz) using  
194 the electromagnetic induction technique (Fuchs and Robinson 1966; Judge et al.  
195 1980). The monkeys were also implanted with a head holder to stabilize their head  
196 during the experiments, with details on all implant surgeries provided earlier (Chen  
197 and Hafed 2013; Skinner et al. 2019). The monkeys were part of a larger  
198 neurophysiology project beyond the scope of the current manuscript.

199

### 200 *Monkey behavioral tasks*

201 The monkeys maintained fixation on a small square spot of approximately 5 x 5 min  
202 arc dimensions. The spot was white (86 cd/m<sup>2</sup>) and drawn over a uniform gray  
203 background (29.7 cd/m<sup>2</sup>) in the rest of the display. The display subtended  
204 approximately +/- 15 deg horizontally and +/- 11 deg vertically relative to central  
205 fixation, and the rest of the laboratory setup beyond the display was dark. After  
206 approximately 550-1800 ms of initial fixation, a single-frame (~8 ms) flash occurred to  
207 modulate the microsaccadic rate signature. In different conditions, the flash could be  
208 either a full-screen flash, for which microsaccades were only partially analyzed in  
209 (Malevich et al. 2020), or a localized flash (not previously analyzed). The latter was a  
210 square of 1 x 1 deg dimensions centered on either 2.1 deg to the right or left of the  
211 fixation spot. On randomly interleaved control trials, the flash was sham (i.e. no flash  
212 was presented), and nothing happened on the display until trial end. Approximately

213 100-1400 ms after flash onset, the fixation spot disappeared, and the monkeys were  
214 rewarded for maintaining gaze fixation at the fixation spot throughout the trial. Note  
215 that this paradigm is the fixation variant of the paradigm that we used earlier during  
216 smooth pursuit eye movements generated by the same monkeys (Buonocore et al.  
217 2019).

218  
219 In one block of sessions, the stimuli used could be white flashes of the same  
220 luminance as the fixation spot (5167 trials analyzed from monkey M and 3104 trials  
221 analyzed from monkey A). In another block, the stimuli were all black flashes, but the  
222 fixation spot was still white (1513 trials analyzed from monkey M and 1818 trials  
223 analyzed from monkey A). Because we hypothesized that black flashes would have  
224 stronger influences in general than white flashes, motivated by earlier evidence in  
225 visual perception studies (Komban et al. 2011; Komban et al. 2014; Lu and Sperling  
226 2012), we aimed to ensure that such stronger influences would be independent of  
227 stimulus contrast relative to the background. That is, because stimulus contrast can  
228 affect the microsaccadic rate signature (as detailed above in Introduction), we  
229 avoided a potential confound of stimulus contrast by having our background gray  
230 luminance level being closer to black than to white. Thus, relative to the background  
231 luminance, the contrast of black flashes was lower than that of white flashes. Yet, as  
232 we report in Results, black flashes often still had significantly stronger impacts on the  
233 microsaccadic rate signature, especially with the localized stimuli.

234

### 235 *Behavioral analyses*

236 We detected microsaccades using established methods reported elsewhere (Bellet et  
237 al. 2019; Chen and Hafed 2013). Both methods rely on a mathematical differential  
238 (i.e. speed) or more (i.e. acceleration) of the digitized eye position signals acquired

239 by our systems, with specific parameters for the classification of saccadic events  
240 depending on the specific signal noise levels in the digitized signals. We manually  
241 inspected each trial to correct for false alarms or misses by the automatic algorithms,  
242 which were rare. We also marked blinks or noise artifacts for later removal. In scleral  
243 eye coil data, blinks are easily discernible due to well-known blink-associated  
244 changes in eye position.

245  
246 We estimated microsaccade rate as a function of time from stimulus onset using  
247 similar procedures to those we used earlier (Buonocore et al. 2017a; Hafed et al.  
248 2011; Malevich et al. 2020). Briefly, for any time window of 80 ms duration and in any  
249 one trial, we counted how many microsaccades occurred within this window (typically  
250 0 or 1). This gave us an estimate of instantaneous rate within such a window (i.e.  
251 expected number of microsaccades per window, divided by 80 ms window duration).  
252 We then moved the window in steps of 5 ms to obtain full time courses. The mean  
253 microsaccade rate curve across all trials of a given condition was then obtained by  
254 averaging the individual trial rate curves, and we obtained the standard error of the  
255 mean as an estimate of the dispersion of the across-trial measurements. Since some  
256 trials ended before 500 ms after flash onset (see *Monkey behavioral tasks* above),  
257 the across-trial average and standard error estimates that we obtained for any given  
258 time bin were restricted to only those individual trials that had data in this time bin;  
259 this was a majority of trials anyway. Also, because of the window duration and step  
260 size, the time courses were effectively low-pass filtered (smoothed) estimates of  
261 microsaccade rate (Bellet et al. 2017). We did not analyze potential higher frequency  
262 oscillations in microsaccade rate time courses. These tend to come later after the  
263 rebound phase anyway (Tian et al. 2016). We also confirmed that pre-stimulus  
264 baseline microsaccade rate in a given monkey was similar in the separate blocks of

265 white and black flashes, therefore allowing us to compare and contrast polarity  
266 effects on the rate signature after flash onsets.

267

268 With localized flashes, we also considered microsaccade rate time courses  
269 independently for specific subsets of microsaccade directions. We specifically  
270 considered microsaccades that were either congruent or incongruent with flash  
271 location (meaning that we pooled right flash and left flash conditions together for  
272 these analyses). Congruent microsaccades were defined as those movements with a  
273 horizontal component in the direction of the flash. Incongruent microsaccades were  
274 defined as movements with a horizontal component opposite the flash location. Our  
275 past work shows that this categorization based on only the horizontal component of  
276 microsaccades is sufficient, since microsaccade vector directions after localized  
277 flashes are anyway highly systematically associated with the flash direction (Hafed  
278 and Ignashchenkova 2013; Tian et al. 2018). In related analyses, we also plotted  
279 direction distributions independently of microsaccade rate. Here, for every time bin  
280 relative to stimulus onset, we calculated the fraction of microsaccades occurring  
281 within this time bin that were congruent with flash location. This gave us a time  
282 course of direction distributions for all microsaccades that did occur (whether during  
283 the inhibition or rebound phases of the microsaccadic rate signature).

284

285 To analyze the time courses of microsaccade radial amplitudes after stimulus onset,  
286 we used similar procedures to the rate calculations described above. That is, we  
287 used a time window of 80 ms that was stepped in 5 ms steps to estimate the time  
288 courses of microsaccade amplitude modulations associated with different types of  
289 stimulus onsets in our experiments.

290

## 291 *Statistical analyses*

292 All figures show and define error bars, which encompassed the standard error  
293 bounds around any given curve.

294  
295 To statistically test the difference in the microsaccadic rate signature between  
296 conditions, we used non-parametric permutation tests with cluster-based correction  
297 for multiple comparisons (Maris and Oostenveld 2007), as we also described in detail  
298 in (Bellet et al. 2017; Idrees et al. 2020). First, for each time point (a bin) within an  
299 interval from -100 ms till +500 ms relative to stimulus onset, we compared two given  
300 conditions (e.g. localized versus full-screen flashes) by calculating the mean  
301 difference in their microsaccade rate. In order to obtain the null experimental  
302 distribution, we collected the trials from both conditions into a single set and, while  
303 maintaining the initial ratio of numbers of trials in each of the conditions, we randomly  
304 permuted their labels; we repeated this procedure 1000 times and recalculated the  
305 test statistic (i.e. the difference in rate curves between the two conditions) on each  
306 iteration. Second, we selected the bins of the original data whose test statistics were  
307 either below the 2.5<sup>th</sup> percentile or above the 97.5<sup>th</sup> percentile of the permutation  
308 distribution (i.e. significant within the 95% confidence level). For adjacent time bins  
309 having significant differences (i.e. for clusters of significance), we classified them into  
310 negative and positive clusters based on the sign of the difference in rate curves  
311 between the two conditions (i.e. clusters had either a negative or positive difference  
312 between the two compared microsaccade rate curves). We also repeated this  
313 procedure for each random permutation iteration by testing it against all other 999  
314 random permutation iterations. This latter step gave us potential clusters of  
315 significance (positive or negative) that could arise by chance in the random  
316 permutations. Third, for both the observed and permuted data, we calculated the

317 cluster-level summary statistic; this was defined as the sum of all absolute mean  
318 differences in any given potentially “significant” cluster. After that, we computed the  
319 Monte Carlo p-values of the original data’s clusters by assessing the probability of  
320 getting clusters with larger or equal cluster-level statistics under the null distribution  
321 (i.e. by taking the count of null data clusters with test statistics equal to or larger than  
322 the test statistic of any given original data cluster and dividing this count by the  
323 number of permutations that we used). A p-value of 0 indicated that none of the  
324 clusters of the null distribution had larger or equal cluster-level statistics than the real  
325 experimental data.

326  
327 When testing either the localized or full-screen flash conditions against the control  
328 condition, the test was two-sided (i.e. looking for either positive or negative clusters)  
329 to avoid mutual masking of the expected inhibition and rebound effects. In this case,  
330 positive and negative clusters (i.e. clusters with positive and negative mean rate  
331 differences, respectively) in the experimental data were compared with positive and  
332 negative clusters in the permuted data, respectively; the clusters whose p-values  
333 exceeded the critical alpha level of 0.025 were considered as significant. All other  
334 comparisons were done with a one-tailed test, whereby the clusters were compared  
335 in their absolute value regardless of their sign; the critical alpha level was set to 0.05  
336 in this case. The same algorithm was applied to the time course analyses of  
337 microsaccade amplitudes, except that here, all tests were one-sided.

338  
339 When comparing magnitudes of the effects in different phases of the microsaccadic  
340 rate signature across conditions, we ran additional non-parametric permutation tests  
341 on the differences in minimum microsaccade rates during the inhibition phase or  
342 differences in peak microsaccade rates in the rebound phase, as well as in their

343 latencies. To that end, based on the observations across monkeys, we predefined  
344 time intervals of interest for both microsaccadic inhibition (i.e. 70-180 ms after  
345 stimulus onset) and post-inhibition (i.e. 180-340 ms after stimulus onset) periods. For  
346 each experimental condition, we computed the mean microsaccade rate within such  
347 a predefined interval and found its extreme value (i.e. the minimum mean inhibition  
348 rate or the maximum mean rebound rate) and its latency relative to stimulus onset.  
349 Then, we calculated the difference in these values between two given conditions. In  
350 order to obtain the null experimental distribution, we did the same procedure as  
351 described above: we collected the trials from both conditions into a single data set  
352 and randomly permuted their labels, while keeping the initial ratio of the numbers of  
353 trials across conditions. We repeated this procedure 1000 times and, on each  
354 iteration, we recalculated the test statistics (i.e. the differences between the rate  
355 values and their latencies, when applicable). Finally, we computed the Monte Carlo  
356 p-values of the observed experimental differences by assessing the probability of  
357 getting the null-hypothesis test values at least as extreme as the observed  
358 experimental values. Significance was classified based on a critical alpha level of  
359 0.05. This procedure also helped us to ensure that we did not miss any effect with  
360 the cluster-based permutation analyses due to different temporal dynamics of the  
361 inhibition and post-inhibition phases of the microsaccadic rate signature across  
362 conditions.

363  
364 The same method was used for amplitude analyses, but this time we compared the  
365 maximum amplitude values in the predefined inhibition time window (i.e. 70-180 ms  
366 after stimulus onset) and the minimum amplitude values in the post-inhibition period  
367 (i.e. 180-340 ms after stimulus onset) when contrasting experimental and control  
368 conditions. In all other cases, the time window of interest was narrowed to +/-5 ms



369 from the minimum microsaccade rate (for the inhibition period) or maximum  
370 microsaccade rate (for the rebound period) retrieved for a given condition, and the  
371 analysis was performed on the microsaccade amplitudes averaged over this time  
372 window.

373  
374 To assess the effect of stimulus polarity on microsaccade directionality irrespective of  
375 the microsaccade rate, we compared the fractions of congruent microsaccades (i.e.  
376 the sum of microsaccades towards the flash divided by the sum of all microsaccades  
377 that occurred in a given time bin) over time between the black and white localized  
378 flashes. For this purpose, we used a bootstrapping procedure to obtain the estimates  
379 of their dispersion. In particular, we randomly resampled our data with replacement  
380 1000 times and computed the fraction of congruent microsaccades for each sample.  
381 The central tendency measure and the estimate of its standard error were retrieved  
382 by calculating the mean and standard deviation of the bootstrap distribution.

383  
384 Finally, when comparing fractions of congruent microsaccades or microsaccade  
385 amplitudes across conditions, we complemented the data visualization in the figures  
386 with microsaccade frequency histograms as a function of time, with bin widths of 24  
387 ms and normalized with respect to the total number of trials in a given condition. This  
388 was done to provide an easier visual comparison between direction or amplitude  
389 effects and microsaccade rate. Such histograms are shown at the bottom of each  
390 panel in the corresponding figures; their scales are arbitrary with respect to the y-axis  
391 but kept proportional across conditions within a given monkey.

392  
393  
394

395 *Data availability*

396 All data presented in this paper are stored in institute computers and are available  
397 upon reasonable request.

398

## 399 **Results**

400  
401 We documented the properties of the microsaccadic rate signature in two rhesus  
402 macaque monkeys as a function of either visual stimulus size - diffuse (full-screen  
403 flash condition) versus localized (localized flash condition) - or visual stimulus polarity  
404 - white versus black. In what follows, we first characterize the diffuse flash results  
405 before switching to the localized flash ones.

406  
407 *Microsaccadic inhibition is similar for diffuse and localized visual flashes*

408 Our full-screen flash condition created a diffuse stimulus over an extended range of  
409 the visual environment (approximately +/- 15 deg horizontally and +/- 11 deg  
410 vertically). On the other hand, our localized flash was much smaller (1 x 1 deg  
411 centered at 2.1 deg eccentricity). Both kinds of flashes were presented for only one  
412 display frame (~8 ms) over a uniform gray background filling the display (Methods);  
413 the rest of the laboratory was dark. We first asked whether microsaccadic inhibition  
414 would occur for both conditions, and whether it would exhibit different properties  
415 across them. For example, if microsaccadic inhibition is a function of sensory neuron  
416 properties (as alluded to in Introduction), then could surround suppression effects  
417 (Hubel and Wiesel 1968; Knierim and Van Essen 1992) associated with large, diffuse  
418 stimuli weaken or delay the occurrence of microsaccadic inhibition? If so, then this  
419 would implicate specific sensory areas, which are particularly sensitive to surround  
420 suppression effects, in contributing to the inhibition phase of the microsaccadic rate  
421 signature.

422  
423 We plotted microsaccade rate as a function of time from stimulus onset for either  
424 diffuse or localized flashes (Methods). Figure 1A shows results with a localized black

425 flash in monkey M, and Fig. 1B shows results with a diffuse (full-screen) black flash  
426 in the same monkey. In each panel, the gray curve shows microsaccade rate in the  
427 control condition in which no stimulus flash was presented (the two gray curves in the  
428 two panels are therefore identical). The red and blue horizontal bars on the x-axis of  
429 each plot show the significant clusters of time in which microsaccade rate was higher  
430 (red) or lower (blue) than control (cluster-based permutation tests; Methods). The  
431 results for the second monkey, A, are shown in Fig. 1D, E. In both monkeys, early  
432 microsaccadic inhibition occurred equally robustly regardless of whether the stimulus  
433 was diffuse or localized. That is, shortly after stimulus onset, there was a robust  
434 decrease in microsaccade likelihood before a subsequent rebound (compare colored  
435 to gray curves). The similarity of such decrease between the two stimulus types  
436 (localized versus diffuse) can be better appreciated by inspecting Fig. 1C, F, in which  
437 we plotted the microsaccade rate curves for the diffuse and localized flashes together  
438 on one graph. In monkey A, the initial microsaccadic inhibition phase was virtually  
439 identical with localized or diffuse black flashes (Fig. 1F); in monkey M, there was an  
440 earlier inhibition with the localized flash (Fig. 1C), but this effect was absent in the  
441 same monkey with white flashes instead of black ones, collected in separate blocks  
442 (Fig. 1G). Monkey A also had similar early inhibition profiles with white diffuse or  
443 white localized flashes (Fig. 1H).

444  
445 Statistically, decreases in microsaccade rate started as early as 65-75 ms after  
446 stimulus onset in the localized black flash condition in both monkeys as well as in the  
447 diffuse black flash condition for monkey A. For monkey M, the inhibition was slightly  
448 delayed, starting at 110 ms after stimulus onset, with diffuse black flashes, as  
449 mentioned above. Specifically, for this monkey (M), the cluster-based permutation  
450 test that we used to investigate the properties of microsaccadic inhibition (Methods)

451 revealed a rate difference between the localized and diffuse conditions during the  
452 interval 50-140 ms after stimulus onset ( $p = 0.017$ ), consistent with a slightly later  
453 inhibition for diffuse flashes (Fig. 1C). Monkey A showed no difference in inhibition  
454 between localized and diffuse black flashes (Fig. 1F). In both monkeys, the time to  
455 peak inhibition was also not different across conditions ( $p = 0.243, 0.421$  for monkeys  
456 M and A, respectively; black flashes). For white flashes, similar conclusions could be  
457 reached ( $p = 0.415, 0.277$  for monkeys M and A, respectively).

458  
459 In terms of the strength of microsaccadic inhibition, we measured microsaccade rate  
460 at the minimum after stimulus onset in the different conditions. We confirmed that  
461 localized and diffuse black flashes led to almost equally strong inhibitory effects as  
462 compared to the control condition in monkey M (mean minimum rate difference = -  
463 1.318 microsaccades/s,  $p = 0$  for localized flashes and mean minimum rate  
464 difference = -1.112 microsaccades/s,  $p = 0$  for full-screen flashes). The difference  
465 between localized and full-screen flashes was not significant ( $p = 0.089$ ). The  
466 measurements for monkey A were similar (mean minimum rate difference = -1.532  
467 microsaccades/s,  $p = 0$  for localized flashes and mean minimum rate difference = -  
468 1.565 microsaccades/s,  $p = 0$  for full-screen flashes), and the difference between  
469 localized and diffuse flashes was also not significant ( $p = 0.711$ ). For white flashes,  
470 similar conclusions could be reached ( $p = 0.11, 0.073$  for monkeys M and A,  
471 respectively, when comparing localized and diffuse flashes for minimum  
472 microsaccade rate).

473  
474 Therefore, microsaccadic inhibition is equally strong with diffuse and localized visual  
475 stimuli. This adds to our earlier observations that even a simple luminance transient

476 on the fixation spot itself is sufficient to induce strong microsaccadic inhibition  
 477 (Buonocore et al. 2017a).

478

479

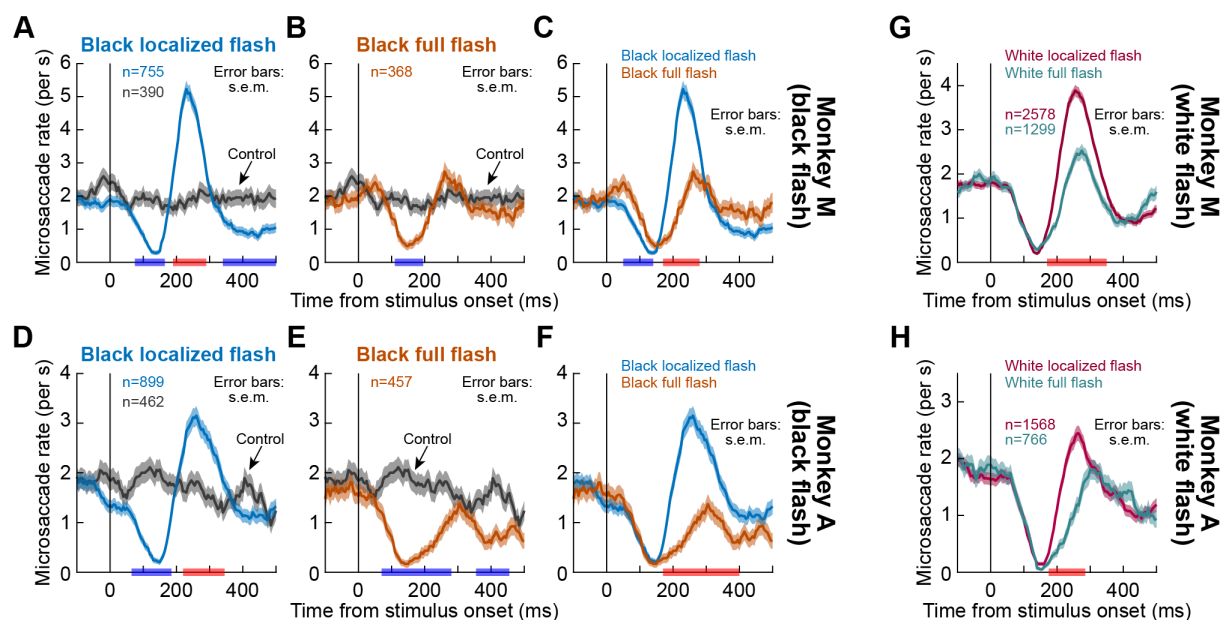

480

481 **Figure 1 Microsaccade rate signatures with localized and diffuse visual stimuli. (A)** Microsaccade  
 482 rate in monkey M when a black localized flash appeared to the right or left of central fixation. The gray  
 483 curve shows control microsaccade rate from trials in which the flash was absent. Relative to baseline  
 484 control rates, microsaccade rate after flash onset decreased rapidly before rebounding. The rebound  
 485 rate was higher than the control rate. At even longer intervals, microsaccade rate decreased again. Error  
 486 bars denote s.e.m. bounds around each curve (Methods). The red and blue labels on the x-axis indicate  
 487 positive (red) and negative (blue) significant clusters for the difference between conditions (flash minus  
 488 control) (Methods). **(B)** Same data but when a full-screen flash was used. The early inhibition was similar  
 489 to **A**, but the rebound was absent; microsaccade rate never went significantly above the control rate.  
 490 **(C)** Microsaccadic rate signatures from **A**, **B** plotted together for easier comparison. Significance  
 491 clusters on the x-axis now indicate whether the localized flash curve was higher (red) or lower (blue)  
 492 than the full-screen flash curve. Significance in this case (i.e. the time points indicated on the x-axis)  
 493 indicates that the two curves were different in absolute value regardless of the sign of the difference  
 494 (Methods). **(D-F)** Same as **A-C**, but with monkey A data. Similar conclusions could be reached. **(G, H)**  
 495 Same as **C, F**, but with white rather than black flashes (collected in separate blocks). Similar conclusions  
 496 to **C, F** could be reached: inhibition occurred with both flash types, but rebound was stronger with  
 497 localized flashes. Note that monkey M had earlier inhibition with localized than diffuse flashes only in  
 498 the black flash condition; with white flashes, monkey M's inhibition was similar for both flash types, like  
 499 in monkey A.

500

501

502

503

504 *Microsaccadic rate rebound is much weaker for diffuse than localized*  
505 *visual flashes, whether black or white*

506 After the microsaccadic inhibition phase, there was a dramatic difference in the  
507 rebound phase of the microsaccadic rate signature between localized and diffuse  
508 flashes. In Fig. 1B, E, it can be seen that with full-screen flashes, post-inhibition  
509 microsaccade rate just returned to the baseline control rate without a clear “rebound”  
510 going above baseline. Targeted permutation tests revealed no difference in peak  
511 microsaccade rate (relative to control) in a predefined rebound interval (Methods) in  
512 monkey M ( $p = 0.098$ ) and even showed an opposite effect in monkey A (mean peak  
513 rate difference =  $-0.489$  microsaccades/s,  $p = 0.019$ ). This is very different from how  
514 microsaccade rate strongly rebounded after the inhibition that was caused by  
515 localized flashes (Fig. 1A, D, indicated by red horizontal bars); peak rate was almost  
516 3 times the baseline control rate in monkey M mean (peak rate difference =  $3.04$   
517 microsaccades/s,  $p = 0$ ; permutation test) and almost 2 times the baseline control  
518 rate in monkey A (mean peak rate difference =  $1.288$  microsaccades/s,  $p = 0$ ;  
519 permutation test) (Fig. 1A, D; compare colored to gray curves).

520  
521 We also compared the rate curves obtained with diffuse and localized flashes with  
522 each other by plotting them together (Fig. 1C, F). Cluster-based permutation tests  
523 revealed a significant difference between conditions in the rebound phase, starting at  
524 170 ms after stimulus onset, for both monkeys ( $p = 0$ ). As can be seen from Fig. 1C,  
525 F, peak microsaccade rate after the inhibition phase with localized flashes was more  
526 than 2 times stronger than peak microsaccade rate after the inhibition phase with  
527 diffuse flashes in both monkeys. We quantified these effects by running permutation  
528 tests on the peak rate values and their latencies. In monkey M, the mean peak rate  
529 difference between localized and diffuse flashes was  $2.491$  microsaccades/s ( $p = 0$ ),

530 and the latency difference was -30 ms ( $p = 0$ ). These values were 1.777  
531 microsaccades/s ( $p = 0$ ) and -45 ms ( $p = 0.026$ ), respectively, for monkey A.  
532  
533 With white flashes, similar conclusions could also be reached (Fig. 1G, H). In this  
534 case, significant differences between diffuse and localized conditions in the post-  
535 inhibition period emerged 170-175 ms after stimulus onset. Moreover, once again,  
536 with localized flashes, microsaccade rate reached its peak earlier (latency difference  
537 = -20 ms,  $p = 0.003$  for monkey M and latency difference = -45 ms,  $p = 0.014$  for  
538 monkey A; permutation tests) and rose higher (mean peak rate difference = 1.36  
539 microsaccades/s,  $p = 0$  for monkey M and mean peak rate difference = 0.643  
540 microsaccades/s,  $p = 0.004$  for monkey A; permutation tests) than with diffuse  
541 stimuli. However, note that the peak in microsaccade rate after localized flashes was  
542 notably lower than that with black flashes, as we describe in more detail later.  
543  
544 To further clarify whether the lack of post-inhibition microsaccadic rebound with  
545 diffuse flashes depended on stimulus polarity, we also plotted the white and black  
546 diffuse flash curves together and statistically assessed the difference between them  
547 (Fig. 2). There were again no apparent differences in time courses associated with  
548 stimulus polarity for diffuse flashes, except for a very late effect in the post-rebound  
549 interval in monkey A indicated by the blue bar in Fig. 2B. For both monkeys, stimulus  
550 polarity did not affect the peak rebound rate ( $p = 0.502$  for monkey M and  $p = 0.093$   
551 for monkey A; permutation tests) nor its latency ( $p = 0.19$  for monkey M and  $p =$   
552  $0.429$  for monkey A; permutation tests). Monkey A did show an earlier maximum  
553 inhibition for black diffuse flashes than for the white ones (latency difference = -10  
554 ms,  $p = 0.015$ ; permutation test) but no difference in its strength ( $p = 0.102$ ;



555 permutation test); neither of the effects reached significance in monkey M ( $p = 0.062$   
556 for minimum rate and  $p = 0.271$  for latency; permutation tests).

557

558 The above results, so far, suggest that diffuse visual stimuli are as effective as  
559 localized visual stimuli in causing robust microsaccadic inhibition in rhesus macaque  
560 monkeys (Fig. 1). However, post-inhibition microsaccade rates are much lower with  
561 diffuse stimuli (Fig. 1). Moreover, these effects with diffuse stimuli are largely  
562 independent of stimulus polarity (Fig. 2). There were also no clear effects on  
563 microsaccade direction distributions with diffuse stimuli (data not shown), as might be  
564 expected due to the symmetric nature of the full-screen flashes relative to the fixation  
565 spot. We next explored the localized stimulus conditions in more detail, highlighting a  
566 significant difference in microsaccadic rate signatures as a function of stimulus  
567 polarity.

568

569

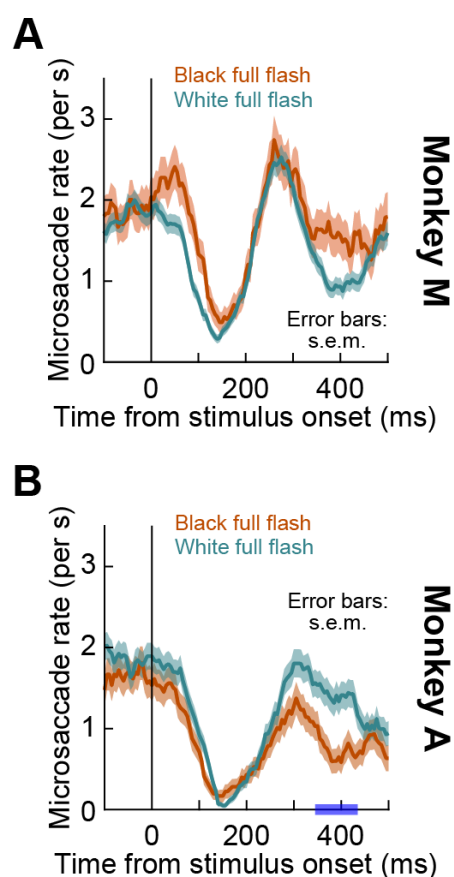

570

571 **Figure 2 Microsaccade rate signatures with black and white diffuse visual stimuli.** For each  
572 monkey, we plotted microsaccade rates from Fig. 1, this time directly comparing black versus white full-  
573 screen flashes. In monkey M, there was only a trend for stronger and earlier inhibition immediately after  
574 stimulus onset with white, rather than black, full-screen flashes (**A**). In monkey A, maximal inhibition was  
575 reached 10 ms earlier for black than white flashes, and there was only a trend for a stronger post-  
576 inhibition rebound in microsaccade rate with white, rather than black, full-screen flashes (**B**). Monkey A  
577 showed a later difference (blue interval on the x-axis delineating a significant interval of negative mean  
578 difference between microsaccade rates in the black and white diffuse flash conditions, obtained with the  
579 one-sided cluster-based permutation test;  $p = 0.002$ ; Methods). All other conventions are similar to Fig.  
580 1.

581

582

583 *Black localized flashes have stronger “cueing effects” than white*

584 *localized flashes*

585 With localized flashes, we saw above that the microsaccadic rate signature looked

586 more similar to classic literature descriptions. That is, there was a strong post-

587 inhibition rebound in microsaccade rate, reaching levels significantly higher than

588 baseline microsaccade-rate during steady-state fixation (colored versus gray curves

589 in Fig. 1A, D, indicated by red horizontal bars on the x-axes). However, comparing

590 the different y-axis scales used in Fig. 1C, F and Fig. 1G, H additionally revealed an  
591 influence of stimulus polarity. Unlike in Fig. 2, there was a substantial effect of black  
592 flashes in particular on the microsaccadic rate signature with localized stimulus  
593 onsets. This effect can be seen clearly in Fig. 3; black localized flashes were  
594 particularly effective in modulating the post-inhibition rebound phase of the  
595 microsaccadic rate signature, as was also confirmed by cluster-based permutation  
596 tests (the red horizontal bars on the x-axes in Fig. 3 indicate the regions of  
597 significantly stronger rebound with black flashes;  $p = 0$  for both monkeys). Both  
598 monkeys showed a significantly higher peak in microsaccade rate with black, rather  
599 than white, visual stimuli (mean peak rate difference = 1.344 microsaccades/s,  $p = 0$   
600 for monkey M and mean peak rate difference = 0.705 microsaccades/s,  $p = 0.002$  for  
601 monkey A; permutation tests). In addition, the rate reached its maximum 25 ms faster  
602 with the black stimuli in the case of monkey M, whereas monkey A showed a similar,  
603 albeit not significant, trend ( $p = 0.001$  for monkey M and  $p = 0.152$  for monkey A;  
604 permutation tests). These observations cannot be explained by stimulus contrast,  
605 because the contrast of the black flash relative to the background luminance was  
606 actually lower, by experimental design, than the contrast of the white flash relative to  
607 the background luminance (Methods).

608  
609 In terms of the initial microsaccadic inhibition phase, it was generally similar whether  
610 black or white localized flashes were used. In monkey M, neither the cluster-based  
611 permutation test nor the analysis of the minimum inhibition rate or its latency brought  
612 significant results ( $p = 0.194$  for minimum rate and  $p = 0.261$  for latency; permutation  
613 tests). In monkey A, there was a significantly earlier inhibition effect caused by black  
614 localized flashes in the interval of 20-105 ms after stimulus onset ( $p = 0.023$ , cluster-  
615 based permutation test), which reached its maximum 10 ms faster than in the case of

616 white flashes ( $p = 0.034$ ; permutation test). However, the difference in the minimum  
617 inhibition rate was again not significant ( $p = 0.315$ ; permutation test), which is in line  
618 with this monkey's polarity effect in the inhibition period for the diffuse flashes.  
619  
620

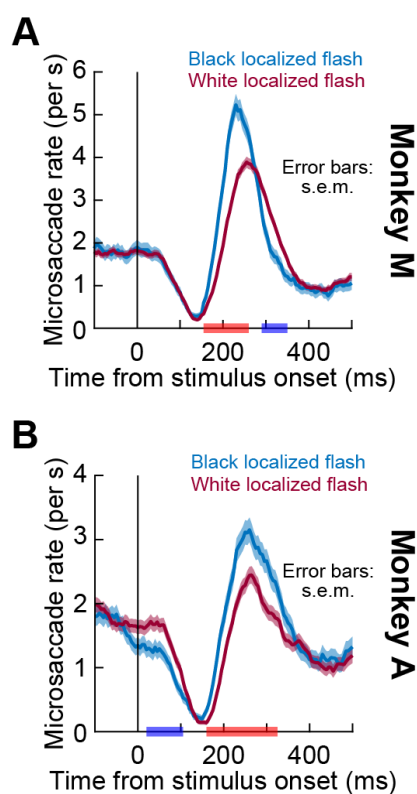

621  
622 **Figure 3 Microsaccade rate signatures with black and white localized visual stimuli.** For each  
623 monkey, we plotted microsaccade rates from Fig. 1, this time directly comparing black versus white  
624 localized flashes, and we performed their time-course analyses with the cluster-based permutation tests  
625 described in Methods. The red and blue labels on the x-axes indicate significant intervals of positive and  
626 negative mean differences, respectively, between microsaccade rates in the black and white localized  
627 flash conditions, obtained with a critical alpha level of 0.05 (i.e. one-sided tests; Methods). In both  
628 monkeys, the post-inhibition microsaccadic rebound was significantly stronger with black than white  
629 localized flashes. This is different from the effects of stimulus polarity that we saw with diffuse flashes  
630 (Fig. 2). All other conventions are similar to Fig. 1.  
631

632  
633 Because localized visual stimuli have a directional component associated with them,  
634 they resemble “cues” in classic attentional cueing tasks. Past work has shown how  
635 such cues, even when task irrelevant (Buonocore et al. 2017a; Hafed and  
636 Ignashchenkova 2013), are associated with very systematic directional modulations

637 of microsaccades when they appear under steady-state fixation conditions. When  
638 viewed from the perspective of the microsaccadic rate signature, these direction  
639 modulations consist of two primary effects: (1) a later inhibition of microsaccades that  
640 are congruent (in their direction) with stimulus location when compared to the  
641 inhibition time of microsaccades that are incongruent with stimulus location; and (2) a  
642 stronger and earlier post-inhibition rebound for microsaccades that are incongruent  
643 with stimulus location than for congruent microsaccades (Hafed et al. 2015; Hafed  
644 and Ignashchenkova 2013; Laubrock et al. 2005; Tian et al. 2018; 2016). In other  
645 words, microsaccades that do occur early after stimulus onset tend to be strongly  
646 biased towards the stimulus location, and microsaccades occurring late after stimulus  
647 onset tend to be biased in the opposite direction, and this is believed to reflect an  
648 interaction between ongoing microsaccade motor commands and visual bursts  
649 associated with stimulus onsets (Buonocore et al. 2017a; Hafed and Ignashchenkova  
650 2013). When we analyzed microsaccadic rate signatures for different microsaccade  
651 directions in our localized flash conditions, we confirmed these expected results,  
652 although the later rebound effect was weaker in monkey A in general. Critically, the  
653 effects were always stronger with black than white stimuli in both monkeys,  
654 consistent with Fig. 3.

655  
656 Specifically, in Fig. 4A, we plotted the rate of congruent and incongruent  
657 microsaccades with a localized black flash for monkey M. Congruent microsaccades  
658 were defined as those with directions towards the stimulus location, and incongruent  
659 ones were opposite the stimulus location (Methods). Congruent microsaccades were  
660 harder to inhibit than incongruent microsaccades (left black arrow), suggesting that in  
661 these early times after stimulus onset, if a microsaccade were to occur, it was more  
662 likely to be directed towards the flash location (Buonocore et al. 2017a; Hafed and

663 Ignashchenkova 2013; Tian et al. 2018; 2016). Quantitatively, the rate curves near  
664 inhibition onset were different in the interval 35-140 ms after stimulus onset ( $p = 0.01$ ;  
665 cluster-based permutation test). Moreover, maximal inhibition was statistically  
666 stronger for incongruent microsaccades ( $p = 0$ ; permutation test), and the maximal  
667 inhibition latency was 20 ms earlier ( $p = 0.04$ ). In the post-inhibition phase, the rate of  
668 incongruent microsaccades rose earlier and reached higher peaks than the rate of  
669 congruent microsaccades (peak rate difference, in absolute value, between the two  
670 curves = 2.484 microsaccades/s and peak latency difference = 10 ms;  $p = 0$  and  
671 0.005, respectively; permutation tests). The two curves started deviating from each  
672 other at 170 ms after stimulus onset ( $p = 0$ ; cluster-based permutation test). These  
673 observations are consistent with the idea that later microsaccades were biased away  
674 from the stimulus location (Buonocore et al. 2017a; Hafd and Ignashchenkova  
675 2013; Tian et al. 2018; 2016). Importantly, both effects were significantly weaker with  
676 white flashes (Fig. 4B). That is, the difference between the congruent and  
677 incongruent curves was smaller overall than in Fig. 4A, and the post-inhibition  
678 rebound rate was also weaker. In fact, with white flashes, the early difference in  
679 inhibition between congruent and incongruent microsaccades was virtually absent  
680 (Fig. 4B). Similarly, the difference in maximal microsaccade rebound rate was now  
681 1.242 microsaccades/s ( $p = 0$ ) as opposed to 2.484 microsaccades/s with black  
682 flashes.

683

684

685

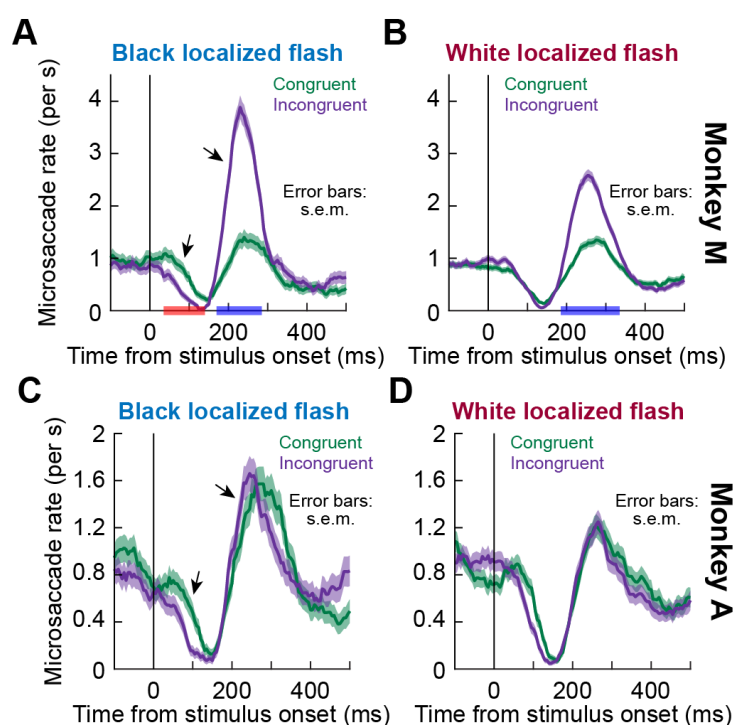

686

687 **Figure 4 Microsaccade rate signatures with black and white localized visual stimuli when**  
 688 **separated based on microsaccade direction. (A)** Microsaccade rate in monkey M computed  
 689 separately for congruent and incongruent microsaccades. Congruent microsaccades were defined as  
 690 those movements directed towards the flash location, and incongruent microsaccades were defined as  
 691 the microsaccades directed opposite the flash location (Methods). This panel shows results with a black  
 692 flash. Consistent with earlier results, congruent microsaccades were harder to inhibit than incongruent  
 693 microsaccades (left black arrow). Later in time, incongruent microsaccades were easier to generate  
 694 than congruent microsaccades in the post-inhibition phase, as evidenced by the earlier and higher post-  
 695 inhibition rise in microsaccade rate (right black arrow). **(B)** With white localized flashes, the difference  
 696 between the congruent and incongruent curves was smaller overall than in **A**, both in the early inhibition  
 697 phase as well as in the later rebound phase. Moreover, the overall rebound peak rate was lower than  
 698 the peak rate with black flashes in **A**. See text for statistics. **(C, D)** Same results for monkey A. This  
 699 monkey showed weaker effects than monkey M, but they were all consistent with the monkey M  
 700 observations. That is, early directional differences associated with microsaccadic inhibition were weaker  
 701 with white flashes **(D)** but amplified with black flashes **(C; left black arrow)**. Moreover, post-inhibition  
 702 rebound was slightly stronger for incongruent microsaccades with black **(C; right black arrow)** than white  
 703 **(D)** localized flashes. All other conventions are similar to Fig. 1. Red and blue bars on x-axes show  
 704 significant clusters of positive (red) and negative (blue) mean differences at the critical alpha level of  
 705 0.05 (Methods).

706

707

708 With monkey A, all of the effects described above were significantly weaker overall  
 709 (Fig. 4C, D). Nonetheless, consistent with monkey M, black localized flashes were  
 710 always associated with stronger trends (Fig. 4C; also see Fig. 5 below for further  
 711 statistical comparisons). Closer inspection of this monkey's eye movement data  
 712 revealed a very strong bias to generate leftward microsaccades, even in baseline  
 713 without any flashes. This strong bias masked the cueing effects after flash onset,

714 which were still present but muted due to the large baseline directional bias. It is  
715 intriguing that even for a monkey like this one, for whom the “cueing effects” with  
716 white flashes were weak (Fig. 4D), they were still amplified with black flashes (Fig.  
717 4C).

718  
719 Therefore, not only were black localized flashes associated with stronger  
720 microsaccadic rate modulations in both monkeys (Fig. 3), these stronger effects had  
721 a directional component, the largest of which was on enhancing the post-inhibition  
722 rebound of incongruent microsaccades (Fig. 4). So-called cueing effects on  
723 microsaccades were, thus, stronger with black than white localized flashes (at least  
724 in monkey M), even though the contrast of the black flashes relative to background  
725 luminance was lower.

726  
727 To further explore this incongruent microsaccade effect in more detail, and to confirm  
728 that it was still present in monkey A despite the baseline directional bias alluded to  
729 above, we plotted the rates of only incongruent microsaccades, now separated  
730 based on whether the localized flash was white or black (Fig. 5). In both monkeys,  
731 the post-inhibition rate of incongruent microsaccades was significantly higher (and  
732 rose earlier) with black localized flashes than with white localized flashes (Fig. 5; right  
733 black arrow in each panel), as also revealed by cluster-based permutation tests ( $p =$   
734  $0$  for monkey M and  $p = 0.003$  for monkey A; intervals: 155-260 ms and 170-260 ms  
735 in monkeys M and A, respectively). Also, both monkeys showed a stronger and  
736 earlier peak rate in the black flash condition than in the white flash condition (monkey  
737 M: peak rate difference = 1.293 microsaccades/s,  $p = 0$  and latency difference = -25  
738 ms,  $p = 0.001$ ; monkey A: peak rate difference = 0.411 microsaccades/s,  $p = 0.015$   
739 and latency difference = -20 ms,  $p = 0.028$ ; permutation tests). Interestingly, in both



740 monkeys, there was a trend for earlier inhibition of incongruent microsaccades with  
741 black flashes when compared to white flashes (Fig. 5; left black arrow in each panel),  
742 which can explain the stronger cueing effects in Fig. 4A, C with black flashes. In  
743 monkey M, the inhibition of incongruent microsaccades with black flashes reached its  
744 maximum 10 ms earlier than with white flashes, although the difference in strength of  
745 the maximum inhibition was not significant ( $p = 0.023$  for latency and  $p = 0.253$  for  
746 minimum rate; permutation test). There were also no significant differences for the  
747 minimum rate and its latency in monkey A ( $p = 0.575$  for minimum rate and  $p = 0.57$   
748 for latency; permutation tests).

749

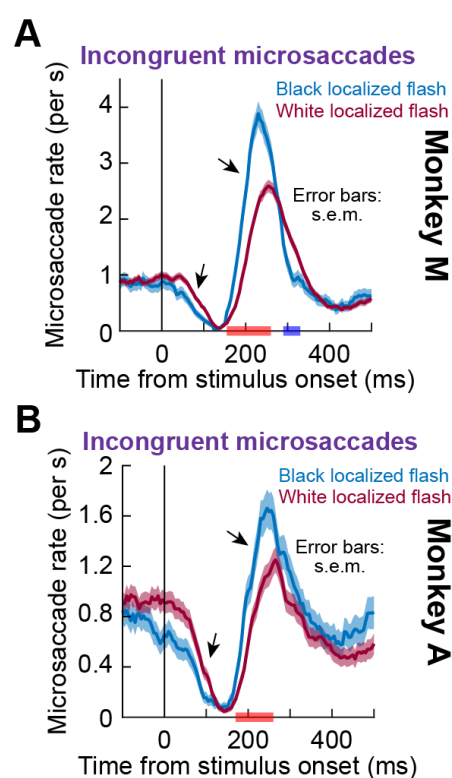

750

751 **Figure 5 Effects of black localized flashes on incongruent microsaccades.** Same data as in Fig. 4,  
752 but now showing the incongruent curves (purple in Fig. 4) for a given monkey under either white (dark  
753 pink) or black (blue) localized flash conditions. In both monkeys, black flashes were associated with  
754 higher rebound of incongruent microsaccades after the initial microsaccadic inhibition than white flashes  
755 (right black arrow in each panel). In both monkeys, there was also a trend for earlier microsaccadic  
756 inhibition time with black than with white flashes (left black arrow in each panel). The red horizontal bars  
757 on the x-axes denote significant clusters of positive mean differences between the black and white  
758 localized flash conditions (i.e. an earlier and stronger effect under the black flash condition, obtained  
759 with one-tailed cluster-based permutation tests at the critical alpha level of 0.05). The blue horizontal  
760 bar in **A** indicates a significant negative cluster showing an inverted pattern at the end of the rebound  
761 phase in monkey M. All other conventions are similar to Fig. 1.

762  
763  
764 For completeness, we next assessed microsaccade directions independently of  
765 microsaccade rates. For each time bin relative to localized flash onset time, we  
766 computed the fraction of microsaccades that both occurred within this time bin and  
767 were also congruent with flash location. This gave us a time course of microsaccade  
768 directions relative to the flash location, which we statistically assessed by performing  
769 bootstrapping with resampling (Methods). We did this separately for black and white  
770 flashes. These results are shown in Fig. 6, in which we also superimposed  
771 histograms of all microsaccade times in each flash condition in order to visually relate  
772 the microsaccade direction time courses with the microsaccadic rate signatures (the  
773 histograms in Fig. 6 are essentially another way to visualize the same rate curves of  
774 localized flashes in Fig. 1). As can be seen, in both monkeys, the likelihood of getting  
775 a microsaccade directed towards the flash sharply increased after stimulus onset,  
776 peaking at the time of maximal inhibition, which is consistent with previous findings  
777 (Buonocore et al. 2017a; Hafed and Ignashchenkova 2013; Pastukhov and Braun  
778 2010; Tian et al. 2018; 2016). In the post-inhibition period, this pattern started to  
779 reverse, although only monkey M demonstrated a strong and expected bias in the  
780 direction opposite to the flash location (Buonocore et al. 2017a; Hafed and  
781 Ignashchenkova 2013; Tian et al. 2018; 2016). This is due to a strong bias in monkey  
782 A to make leftward microsaccades even in baseline, as mentioned above, which  
783 masked the transient flash effects. Nonetheless, both monkeys showed a trend for  
784 increased early bias in microsaccade directions towards flash location with black  
785 stimuli, consistent with Figs. 4, 5 above. In monkey M, the black flashes were also  
786 associated with more opposite microsaccades in the rate rebound phase after

787 microsaccadic inhibition when compared to the white flashes. These results are  
788 again consistent with Figs. 4, 5 above.

789

790

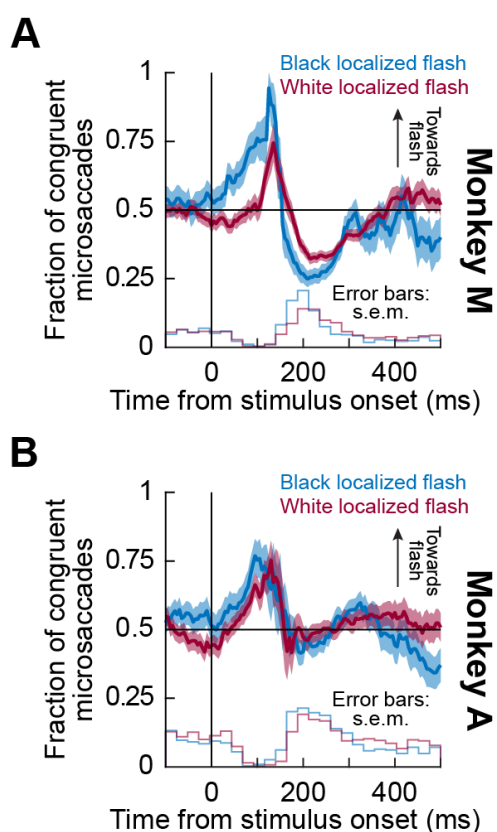

791

792 **Figure 6 Distribution of microsaccade directions relative to localized flash location for black and**  
793 **white flashes.** The thick curves with error bars show the time courses of fractions of microsaccades  
794 directed towards the flash location under either white or black localized flash conditions. The means and  
795 their standard errors were computed using bootstrapping with replacement. The histograms at the  
796 bottom of each panel show in the corresponding color the frequency of all microsaccades, regardless  
797 of their direction, that happened under the black and white localized flash conditions. The histograms  
798 were normalized with respect to the number of trials in a given condition; their scales are arbitrary with  
799 respect to the y-axis but kept proportional to each other within a given monkey. In both monkeys, the  
800 fraction of congruent microsaccades increased during the inhibition phase and started to decrease at  
801 the beginning of the rebound period. In addition, both monkeys showed a tendency for an earlier  
802 inhibition of incongruent microsaccades with black stimuli (i.e. stronger directional modulation towards  
803 the flash location), whereas only monkey M demonstrated an effect of stimulus polarity in the rebound  
804 phase after microsaccadic inhibition. All other conventions are similar to Fig. 1.

805

806

807

808

809 *Microsaccade amplitudes exhibit stronger temporal oscillations after*  
810 *stimulus onset with localized than diffuse flashes, but with no*  
811 *dependence on stimulus polarity*

812 Because cue onsets, particularly when localized, can transiently modulate  
813 instantaneous foveal eye position errors at the fixation spot (Tian et al. 2018; 2016),  
814 microsaccade amplitude is also expected to be affected along with the microsaccadic  
815 rate signature (Buonocore et al. 2017a). We therefore documented the time courses  
816 of microsaccade amplitude variations after stimulus onset for our different stimulus  
817 sizes and polarities.

818  
819 In terms of stimulus size, Fig. 7A-F shows comparisons between microsaccade  
820 amplitude time courses for diffuse and localized black flashes, similar in approach to  
821 Fig. 1A-F. In both monkeys, localized flashes caused marked modulations of  
822 microsaccade amplitude relative to baseline control amplitudes (Fig. 7A, D).

823 Specifically, in the early inhibition phase in which microsaccades were likely to be  
824 directed towards the flash location (Fig. 4), microsaccade amplitude increased:

825 permutation tests in the predefined period of 70-180 ms after stimulus onset  
826 (Methods) showed that peak microsaccade amplitudes for localized flashes were

827 0.156 deg ( $p = 0.032$ ) higher in monkey M and 0.105 deg ( $p = 0.004$ ) higher in

828 monkey A than in control. So, the few microsaccades that did occur during

829 microsaccadic inhibition were enlarged (Buonocore et al. 2017a). For later post-

830 inhibition microsaccades, which were predominantly incongruent microsaccades

831 (Figs. 4-6), microsaccade amplitude decreased: minimum amplitudes in the

832 predefined interval of 180-340 ms after stimulus onset were 0.138 deg smaller than

833 for the control in monkey M and 0.058 deg smaller than for the control in monkey A

834 and ( $p = 0$  and  $0.016$  for monkeys M and A, respectively; permutations tests). With  
835 full-screen flashes, both monkeys had a significant increase in the peak amplitudes in  
836 the early inhibition interval of 70-180 ms (mean difference =  $0.257$  deg,  $p = 0$  for  
837 monkey M and mean difference =  $0.109$  deg,  $p = 0.003$  for monkey A; permutation  
838 tests). However, there were no clear differences between microsaccade amplitudes  
839 with or without diffuse flashes later on in the post-inhibition period (compare colored  
840 to gray curves), even between minimum amplitudes within the predefined rebound  
841 interval ( $p = 0.723$  for monkey M and  $p = 0.318$  for monkey A; permutation tests).  
842 Moreover, direct comparisons between localized and diffuse flashes confirmed that  
843 rebound microsaccades became smaller in amplitude with localized, but not diffuse,  
844 flashes (Fig. 7C, F). Similar observations were made with white flashes (Fig. 7G, H).  
845 In fact, direct evaluation of stimulus polarities under the different stimulus size  
846 conditions showed that amplitude effects did not strongly depend on stimulus polarity  
847 (Fig. 8). If anything, there was a trend for white flashes, small or large, to be  
848 associated with stronger overall amplitude modulations as a function of time after  
849 stimulus onset (Fig. 8).  
850  
851

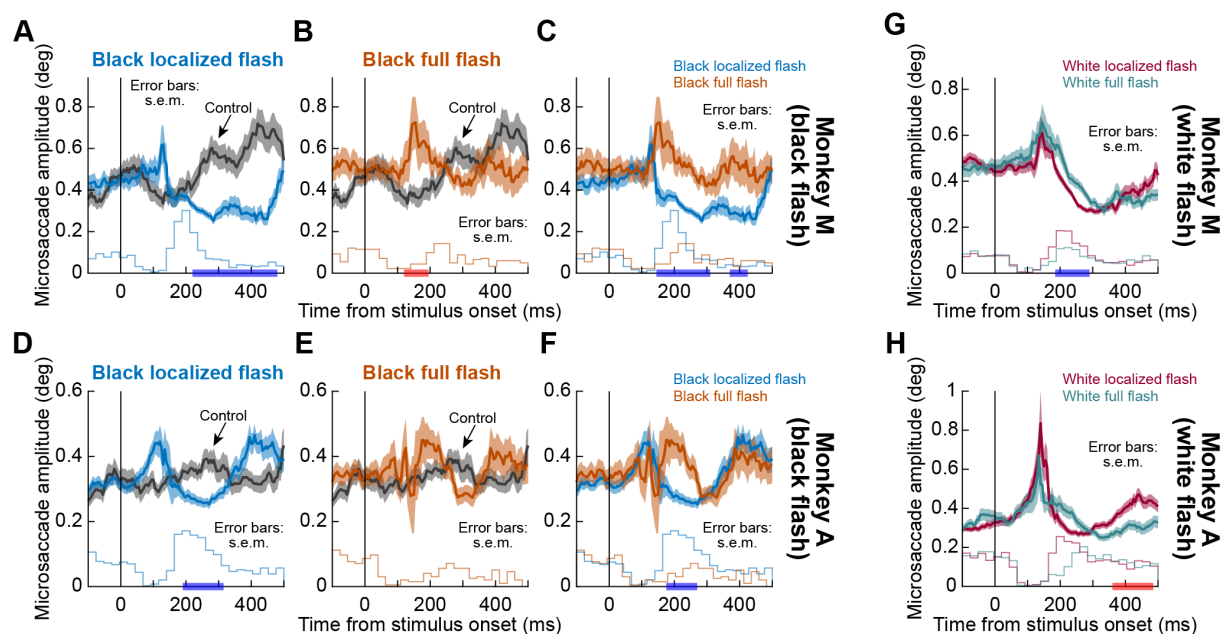

852

853 **Figure 7 Microsaccade amplitudes for the data of Fig. 1.** Same analyses as in Fig. 1, but for  
854 microsaccade amplitude. Localized black flashes (**A, D**) were associated with an initial amplitude  
855 increase during the initial inhibition phase of the microsaccadic rate signature followed by an amplitude  
856 decrease (relative to control) during the rebound phase. Full-screen flashes (**B, E**) did not show a clear  
857 decrease in amplitude in the post-inhibition phase of the microsaccadic rate signature. Direct  
858 comparisons between localized and diffuse black flashes are shown in (**C, F**), confirming that localized  
859 flashes caused stronger amplitude modulations. The effects with white flashes are shown in (**G, H**). Red  
860 and blue labels on x-axes indicate, respectively, clusters with positive and negative mean differences  
861 between localized (**A, D**) or full-screen (**B, E**) flashes and the control condition; or between localized and  
862 full-screen flashes (**C, F-H**). Significance was defined at the 0.05 level after cluster-based correction for  
863 multiple comparisons (Methods). The histograms at the bottom of each panel show, in the corresponding  
864 color, the frequency of microsaccades that happened under a given condition. The histogram  
865 conventions are the same as in Fig. 6. All other conventions are similar to Fig. 1.

866

867

868

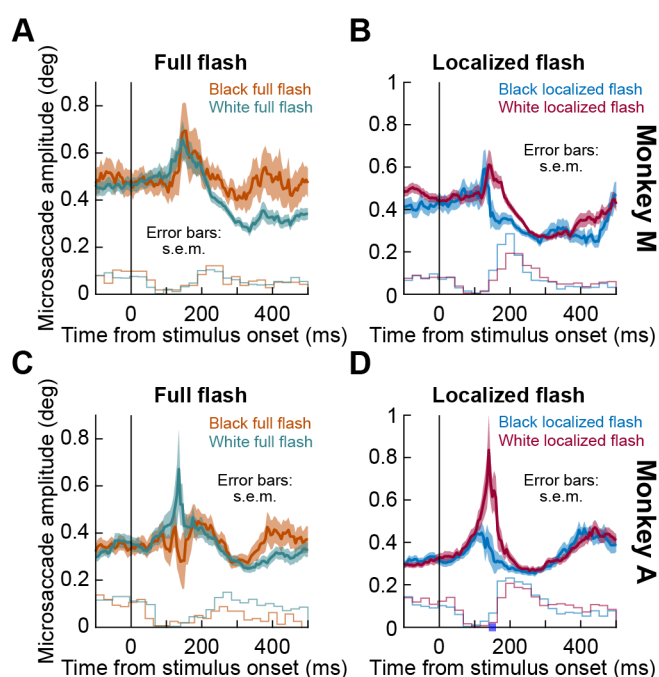

869

870 **Figure 8 Effects of white and black flashes on microsaccade amplitude time courses with diffuse**  
871 **and localized stimuli.** For each monkey (rows) and each flash size (columns), we compared  
872 microsaccade amplitude time courses with white or black flashes. There was no strong dependence on  
873 stimulus polarity in microsaccade amplitudes. The blue label on the x-axis in **D** indicates the only  
874 significant cluster of a short-lasting negative mean difference between black localized and white  
875 localized flashes (at 140-160 ms,  $p = 0.031$ ; cluster-based permutation test). The histogram conventions  
876 are the same as in Fig. 6. All other conventions are similar to Fig. 1.

877

878

879

880 *Microsaccade amplitudes are correlated with directional biases in*

881 *microsaccades after localized flashes, whether white or black*

882 Finally, to directly test the link between the amplitude modulation caused by our

883 localized stimuli and microsaccade directions, we analyzed the time courses of

884 microsaccade amplitudes with localized flashes, now split based on microsaccade

885 congruency for both black (Fig. 9A, C) and white (Fig. 9B, D) flashes. In both

886 monkeys, the amplitude of congruent saccades was modulated by stimulus onset

887 and increased relative to the pre-stimulus period in the early inhibition phase, as

888 predicted by previous findings (Hafed and Ignashchenkova 2013), thereby confirming

889 our inferences in relation to Fig. 7. Cluster-based permutation tests revealed that this

890 effect was significantly different from the amplitude of incongruent microsaccades in  
891 black flashes for monkey M (Fig. 9A) and in white flashes in monkey A (Fig. 9D) ( $p =$   
892  $0.009$  for monkey M and  $p = 0.004$  for monkey A). Monkey M also demonstrated a  
893 similar trend for white flashes (Fig. 9B). Permutation tests run on average amplitudes  
894 in the time window of  $\pm 5$  ms around the maximum inhibition rates did not reveal  
895 additional differences: in fact, only in the black flash condition, the amplitude of  
896 congruent saccades was significantly larger than that of incongruent ones (mean  
897 difference =  $0.406$  deg,  $p = 0.001$ ) in monkey M. Consistent with our analysis of the  
898 microsaccade amplitude modulation by the stimulus polarity (Fig. 8), this effect did  
899 not depend on whether the flash was black or white.

900

901 In contrast, during the later post-inhibition phase, microsaccade amplitudes  
902 decreased and went back to, or even below, the pre-stimulus baseline; this was true  
903 for both congruent and incongruent microsaccades and did not depend on stimulus  
904 polarity, except for the white localized flash condition in monkey M (Fig. 9B), where  
905 the amplitude of microsaccades directed towards the stimulus dramatically  
906 decreased as compared to incongruent microsaccades at 250-360 ms after stimulus  
907 onset ( $p = 0.016$ , cluster-based permutation test; i.e. by the end of the rebound  
908 phase). No differences were found in the average amplitudes in the time window of  
909  $\pm 5$  ms around the peak rebound rates for either monkey, again with the exception of  
910 smaller congruent saccades for white flashes in monkey M (mean difference =  $-0.077$   
911 deg,  $p = 0$ ; permutation test).

912

913 Therefore, all of the above results taken together suggest that the strongest overall  
914 effects of stimulus polarity emerged with small, localized flashes for which  
915 microsaccade rate in the rebound phase of the microsaccadic rate signature was the



916 strongest with black, rather than white, flashes. This was associated with related  
917 effects on microsaccade directions and amplitudes. With diffuse flashes, black stimuli  
918 were as effective as white ones, in general, whether on microsaccadic inhibition or  
919 subsequent rebound.  
920  
921

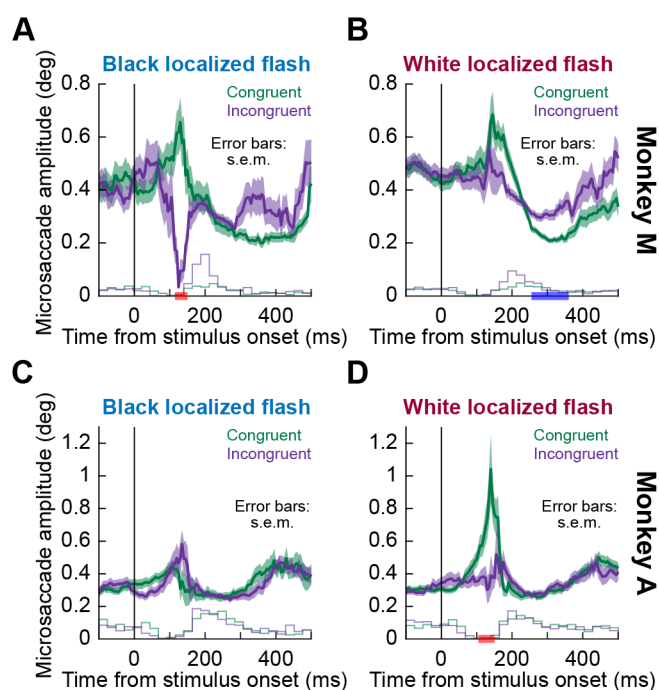

922  
923 **Figure 9 Time courses of microsaccade amplitudes with black and white localized flashes when**  
924 **separated based on microsaccade direction.** Both black and white localized flashes caused an  
925 increase in the amplitude of microsaccades directed towards the flash (green curves) during the initial  
926 inhibition phase of the microsaccadic rate signature, and its difference with the amplitude of incongruent  
927 microsaccades became significant in white flashes for monkey A (indicated by the red horizontal label  
928 in **D**) and black flashes for monkey M (indicated by the red horizontal label in **A**). Monkey M also  
929 demonstrated a similar trend for white flashes (**B**). During the later post-inhibition phase, the amplitude  
930 of both congruent and incongruent microsaccades returned to or went slightly below the baseline, and  
931 the pattern did not depend on microsaccade direction, with the exception of the white localized flashes  
932 in monkey M, where the amplitude modulation of congruent microsaccades was stronger by the end of  
933 the rebound period (indicated by the blue label on the x-axis in **B**). The histograms at the bottom of each  
934 panel show, in the corresponding color, the frequency of congruent and incongruent microsaccades  
935 under a given condition. The histogram conventions are the same as in Fig. 6. All other conventions are  
936 similar to Fig. 1.  
937

938

## 939 Discussion

940 We investigated the effects of stimulus polarity and size on the microsaccadic rate  
941 signature after stimulus onsets. We exploited the fact that even subtle and highly  
942 fleeting flashes of only ~8 ms duration are sufficient to cause rapid microsaccadic  
943 inhibition after their occurrence followed by a rebound in microsaccade rate. We  
944 found that the inhibition was similar for small, localized flashes and large, diffuse  
945 ones. However, the subsequent rebound was completely absent with the latter  
946 flashes. In terms of stimulus polarity, it had the biggest effects with localized flashes.  
947 For these localized flashes, black stimuli caused more substantial changes in the  
948 microsaccadic rate signature than white ones, and particularly in the rebound phase  
949 after the initial microsaccadic inhibition had ended.

950  
951 Our results can inform hypotheses about the neural mechanisms for microsaccadic  
952 and saccadic inhibition. In (Hafed and Ignashchenkova 2013), we hypothesized that  
953 the rate signature reflects visual neural activity in oculomotor areas like, but not  
954 exclusively restricted to, the SC. We specifically hypothesized that the dissociation  
955 between rate and direction effects (also present in our own data; e.g. Fig. 6) might  
956 reflect spatial read out of SC visual activity for the direction effects (Buonocore et al.  
957 2017a) but additional, and potentially different, use of visual activity by the  
958 oculomotor system to inhibit saccades for the rate effects (Hafed and  
959 Ignashchenkova 2013). Consistent with this, in our current experiments, the similarity  
960 that we observed for microsaccadic inhibition between small and large stimuli (Fig. 1)  
961 suggests that the early rate effect (i.e. microsaccadic inhibition) is an outcome of  
962 early sensory activity that is not necessarily strictly spatial in organization. We  
963 hypothesized earlier (Hafed and Ignashchenkova 2013) that a candidate area for  
964 realizing such rapid saccadic inhibition could be a late motor area with access to

965 early sensory information. Our ongoing experiments in our laboratory, comparing V1,  
966 SC, and brainstem omnipause neurons (Buttner-Ennever et al. 1988; Everling et al.  
967 1998; Gandhi and Keller 1999), strongly support the hypothesis that it is visual  
968 sensation by omnipause neurons that is most likely to mediate saccadic inhibition  
969 (Buonocore et al. 2020). This would be consistent with our present observations on  
970 similar inhibition between small and large stimuli.

971  
972 The difference in post-inhibition microsaccadic rebound that we observed between  
973 small and large stimuli is also consistent with spatially-organized maps for the spatial  
974 components of saccadic inhibition (Buonocore et al. 2017a; Haged and  
975 Ignashchenkova 2013). Specifically, with localized flashes, spatial read out of visual  
976 stimulus location, say in SC, would cause direction oscillations of microsaccades  
977 (Tian et al. 2016). On the other hand, diffuse stimuli centered on fixation would  
978 activate symmetric populations of neurons simultaneously. This might not “attract”  
979 early microsaccades in any one direction and therefore alleviates the need for  
980 opposite microsaccades to occur later in the post-inhibition microsaccadic rebound  
981 phase. Thus, with diffuse and symmetric flashes, early microsaccades near the  
982 inhibition phase would not introduce large foveal eye position errors like might  
983 happen with small, localized peripheral cues. As a result, there would be no need to  
984 trigger corrective microsaccades after the inhibition. Indeed, in our earlier work, we  
985 showed that shaping the landscape of peripheral visual activity in an oculomotor  
986 map, either with extended bars or with simultaneous stimulus onsets at multiple  
987 locations, not only influences the directions of early microsaccades, but it also affects  
988 subsequent post-inhibition microsaccades, which become oppositely directed from  
989 the earlier ones (Haged and Ignashchenkova 2013). Moreover, we later confirmed  
990 that eye position error was indeed an important factor in whether microsaccades

991 were triggered or not (Tian et al. 2018; 2016). Naturally, in behaviors like reading, in  
992 which the subsequent forward saccade after any flash is a necessity imposed by the  
993 behavioral task at hand, full-screen flashes would be expected to exhibit some post-  
994 inhibition rate rebound. This was shown previously (Reingold and Stampe 2004),  
995 although even in that study, rebound rates were higher with localized flashes.  
996  
997 Concerning stimulus polarity itself, it is very intriguing that its largest effects appeared  
998 on the post-inhibition rebound phase after small, localized flashes (Figs. 3, 5). In our  
999 earlier models, we had modeled post-inhibition microsaccades as being driven with  
1000 greater “urgency” than baseline microsaccades (Hafed and Ignashchenkova 2013;  
1001 Tian et al. 2016) as if there is extra drive associated with them, needed to recover  
1002 from the disruptions caused by the stimulus onsets. In later experiments, when we  
1003 reversibly inactivated FEF, we found that the greatest effects on the microsaccadic  
1004 rate signature were on post-inhibition microsaccades (Peel et al. 2016), suggesting  
1005 that the extra drive might come from frontal cortical areas. This might make sense in  
1006 retrospect: while inhibition may be mediated by rapid, reflexive responses of the  
1007 oculomotor system to sensory stimulation, post-inhibition eye movements might  
1008 reflect processes attempting to recover from external disruptions to the ongoing  
1009 oculomotor rhythm. These processes likely involve additional drive from cortex, a  
1010 suggestion also made for large saccades (Buonocore et al. 2017b). Our current  
1011 results of differential effects of black localized stimuli on post-inhibition  
1012 microsaccades add to the evidence above that different components of the  
1013 microsaccadic rate signature (e.g. inhibition versus rebound) are governed by distinct  
1014 and dissociable neural mechanisms.

1015

1016 Concerning why or how stimulus polarity revealed the differences alluded to above,  
1017 we think that lags between black and white flashes during inhibition (e.g. Figs. 3, 5)  
1018 might reflect the differences in time that it takes to propagate visual information from  
1019 the retina to other structures for dark versus light stimuli. For example, it was shown  
1020 that darks propagate faster than lights to visual cortex due to functional asymmetries  
1021 in ON and OFF visual pathways (e.g. Westner and Dalal 2019) – in humans; in cats:  
1022 Jin et al. 2011; Jin et al. 2008; Komban et al. 2014), although it is not absolutely clear  
1023 at which level of the visual system the temporal advantages of darks first emerge. On  
1024 the other hand, it is interesting that in our case, black stimuli enhanced  
1025 microsaccadic rebound rates with localized flashes without necessarily affecting the  
1026 timing of the rebound microsaccades so much. So, it is not just a matter of speed of  
1027 the visual pathways that may be at play. An additional factor could be that the visual  
1028 system might be more sensitive to lower luminances irrespective of the contrast (e.g.  
1029 in texture discrimination tasks; Chubb and Nam 2000). In addition, we have to  
1030 consider that our black localized stimuli had more contrast relative to the fixation spot  
1031 than the white stimuli (although the black flashes were spatially far from the fixation  
1032 spot, so this effect of contrast relative to the fixation spot might not be so critical). For  
1033 larger saccades during reading (Reingold and Stampe 2003), black flashes seemed  
1034 to cause stronger inhibition, but the problem there is that their white flashes did not  
1035 occlude the black text; thus, their white flashes were likely lower in contrast than their  
1036 black flashes.

1037  
1038 Regardless of the exact causes, our results on stimulus polarity might also be  
1039 relevant for attention studies since microsaccades are often described as a  
1040 biomarker for attentional shifts (Engbert and Kliegl 2003; Hafed and Clark 2002;  
1041 Pastukhov and Braun 2010; Tian et al. 2018; 2016). Our results can therefore allow

1042 making predictions with respect to cueing effects demonstrated in typical Posner-  
1043 style cueing tasks (Posner 1980; Posner and Cohen 1984). For example, our  
1044 observations might partially explain the mixed results for cue luminance  
1045 manipulations in cueing paradigms. In these manipulations, varying the cue  
1046 luminance energy is usually coupled with varying stimulus contrast relative to the  
1047 background (e.g. Hughes 1984; Mele et al. 2008; Wright and Richard 2003; Zhao  
1048 and Heinke 2014). Thus, dark cues are necessarily perceptually degraded when  
1049 compared to bright cues, because of their reduced contrast levels relative to the  
1050 background. This means that it is still not entirely clear how stimulus polarity factors  
1051 in cueing paradigms. In our study, the post-inhibition rate of incongruent  
1052 microsaccades was significantly higher with black localized stimuli than with white  
1053 localized ones. Taking into account that inhibition of return (IOR) (Klein 2000; Posner  
1054 and Cohen 1984), which occurs exactly during the post-inhibition phase, might be a  
1055 direct outcome of the increased likelihood of incongruent microsaccades (Hafed et al.  
1056 2015; Tian et al. 2018; 2016), we would predict a stronger IOR effect caused by dark  
1057 cues as opposed to white cues but no pronounced effect of stimulus polarity on the  
1058 early facilitation component, when all other experimental parameters such as the  
1059 relative contrast of white and black stimuli are kept at comparable levels.

1060

1061

1062

1063

1064 **Acknowledgements**

1065 We were funded by the Deutsche Forschungsgemeinschaft (DFG) through the  
1066 Research Unit: FOR 1847 (project: HA6749/2-1). We were also funded by the  
1067 Werner Reichardt Centre for Integrative Neuroscience (CIN; DFG EXC307) and the  
1068 Hertie Institute for Clinical Brain Research. TM and ZMH were additionally supported  
1069 by a CIN intramural grant (Mini\_GK 2017-04).

1070

1071 **Author contributions**

1072 AB and ZMH collected the data. TM, AB, and ZMH analyzed the data. TM, AB, and  
1073 ZMH wrote and edited the manuscript.

1074

1075 **Declaration of interests**

1076 The authors declare no competing interests.

1077

1078

1079

## 1080 **References**

1081 **Bellet J, Chen CY, and Hafed ZM.** Sequential hemifield gating of alpha- and beta-  
1082 behavioral performance oscillations after microsaccades. *J Neurophysiol* 118: 2789-  
1083 2805, 2017.

1084 **Bellet ME, Bellet J, Nienborg H, Hafed ZM, and Berens P.** Human-level saccade  
1085 detection performance using deep neural networks. *J Neurophysiol* 121: 646-661,  
1086 2019.

1087 **Bompas A, and Sumner P.** Saccadic inhibition reveals the timing of automatic and  
1088 voluntary signals in the human brain. *The Journal of neuroscience : the official*  
1089 *journal of the Society for Neuroscience* 31: 12501-12512, 2011.

1090 **Bonneh YS, Adini Y, and Polat U.** Contrast sensitivity revealed by microsaccades.  
1091 *J Vis* 15: 11, 2015.

1092 **Buonocore A, Baumann MP, and Hafed ZM.** Visual pattern analysis by motor  
1093 neurons (Abstract). *Computational and Systems Neuroscience (Cosyne) 2020*  
1094 *Conference* 147, 2020.

1095 **Buonocore A, Chen CY, Tian X, Idrees S, Munch TA, and Hafed ZM.** Alteration of  
1096 the microsaccadic velocity-amplitude main sequence relationship after visual  
1097 transients: implications for models of saccade control. *J Neurophysiol* 117: 1894-  
1098 1910, 2017a.

1099 **Buonocore A, and McIntosh RD.** Saccadic inhibition underlies the remote distractor  
1100 effect. *Exp Brain Res* 191: 117-122, 2008.

1101 **Buonocore A, McIntosh RD, and Melcher D.** Beyond the point of no return: effects  
1102 of visual distractors on saccade amplitude and velocity. *J Neurophysiol* 115: 752-762,  
1103 2016.

1104 **Buonocore A, Purokayastha S, and McIntosh RD.** Saccade Reorienting Is  
1105 Facilitated by Pausing the Oculomotor Program. *J Cogn Neurosci* 29: 2068-2080,  
1106 2017b.

1107 **Buonocore A, Skinner J, and Hafed ZM.** Eye Position Error Influence over "Open-  
1108 Loop" Smooth Pursuit Initiation. *J Neurosci* 39: 2709-2721, 2019.



- 1109 **Buttner-Ennever JA, Cohen B, Pause M, and Fries W.** Raphe nucleus of the pons  
1110 containing omnipause neurons of the oculomotor system in the monkey, and its  
1111 homologue in man. *J Comp Neurol* 267: 307-321, 1988.
- 1112 **Chen CY, and Hafed ZM.** Postmicrosaccadic enhancement of slow eye movements.  
1113 *The Journal of neuroscience : the official journal of the Society for Neuroscience* 33:  
1114 5375-5386, 2013.
- 1115 **Chen CY, Ignashchenkova A, Thier P, and Hafed ZM.** Neuronal Response Gain  
1116 Enhancement prior to Microsaccades. *Curr Biol* 25: 2065-2074, 2015.
- 1117 **Chichilnisky EJ, and Kalmar RS.** Functional asymmetries in ON and OFF ganglion  
1118 cells of primate retina. *J Neurosci* 22: 2737-2747, 2002.
- 1119 **Chubb C, and Nam JH.** Variance of high contrast textures is sensed using negative  
1120 half-wave rectification. *Vision Res* 40: 1677-1694, 2000.
- 1121 **Edelman JA, and Xu KZ.** Inhibition of voluntary saccadic eye movement commands  
1122 by abrupt visual onsets. *J Neurophysiol* 101: 1222-1234, 2009.
- 1123 **Engbert R, and Kliegl R.** Microsaccades uncover the orientation of covert attention.  
1124 *Vision Res* 43: 1035-1045, 2003.
- 1125 **Everling S, Pare M, Dorris MC, and Munoz DP.** Comparison of the discharge  
1126 characteristics of brain stem omnipause neurons and superior colliculus fixation  
1127 neurons in monkey: implications for control of fixation and saccade behavior. *J*  
1128 *Neurophysiol* 79: 511-528, 1998.
- 1129 **Fuchs AF, and Robinson DA.** A method for measuring horizontal and vertical eye  
1130 movement chronically in the monkey. *J Appl Physiol* 21: 1068-1070, 1966.
- 1131 **Gandhi NJ, and Keller EL.** Activity of the brain stem omnipause neurons during  
1132 saccades perturbed by stimulation of the primate superior colliculus. *J Neurophysiol*  
1133 82: 3254-3267, 1999.
- 1134 **Hafed ZM.** Alteration of visual perception prior to microsaccades. *Neuron* 77: 775-  
1135 786, 2013.
- 1136 **Hafed ZM, Chen C-Y, and Tian X.** Vision, perception, and attention through the lens  
1137 of microsaccades: mechanisms and implications. *Frontiers in systems neuroscience*  
1138 9: 167, 2015.

- 1139 **Hafed ZM, and Clark JJ.** Microsaccades as an overt measure of covert attention  
1140 shifts. *Vision Res* 42: 2533-2545, 2002.
- 1141 **Hafed ZM, and Ignashchenkova A.** On the dissociation between microsaccade rate  
1142 and direction after peripheral cues: microsaccadic inhibition revisited. *J Neurosci* 33:  
1143 16220-16235, 2013.
- 1144 **Hafed ZM, Lovejoy LP, and Krauzlis RJ.** Modulation of microsaccades in monkey  
1145 during a covert visual attention task. *Journal of Neuroscience* 31: 15219-15230,  
1146 2011.
- 1147 **Hafed ZM, Lovejoy LP, and Krauzlis RJ.** Superior colliculus inactivation alters the  
1148 relationship between covert visual attention and microsaccades. *Eur J Neurosci* 37:  
1149 1169-1181, 2013.
- 1150 **Hawkins HL, Shafto MG, and Richardson K.** Effects of target luminance and cue  
1151 validity on the latency of visual detection. *Percept Psychophys* 44: 484-492, 1988.
- 1152 **Hubel DH, and Wiesel TN.** Receptive fields and functional architecture of monkey  
1153 striate cortex. *J Physiol* 195: 215-243, 1968.
- 1154 **Hughes HC.** Effects of flash luminance and positional expectancies on visual  
1155 response latency. *Percept Psychophys* 36: 177-184, 1984.
- 1156 **Idrees S, Baumann MP, Franke F, Munch TA, and Hafed ZM.** Perceptual saccadic  
1157 suppression starts in the retina. *Nat Commun* 11: 1977, 2020.
- 1158 **Jin J, Wang Y, Lashgari R, Swadlow HA, and Alonso JM.** Faster thalamocortical  
1159 processing for dark than light visual targets. *J Neurosci* 31: 17471-17479, 2011.
- 1160 **Jin JZ, Weng C, Yeh CI, Gordon JA, Ruthazer ES, Stryker MP, Swadlow HA, and**  
1161 **Alonso JM.** On and off domains of geniculate afferents in cat primary visual cortex.  
1162 *Nat Neurosci* 11: 88-94, 2008.
- 1163 **Judge SJ, Richmond BJ, and Chu FC.** Implantation of magnetic search coils for  
1164 measurement of eye position: an improved method. *Vision Res* 20: 535-538, 1980.
- 1165 **Kean M, and Lambert A.** The influence of a salience distinction between bilateral  
1166 cues on the latency of target-detection saccades. *British journal of psychology* 94:  
1167 373-388, 2003.
- 1168 **Klein RM.** Inhibition of return. *Trends in cognitive sciences* 4: 138-147, 2000.

- 1169 **Knierim JJ, and Van Essen DC.** Visual cortex: cartography, connectivity, and  
1170 concurrent processing. *Curr Opin Neurobiol* 2: 150-155, 1992.
- 1171 **Komban SJ, Alonso JM, and Zaidi Q.** Darks are processed faster than lights. *J*  
1172 *Neurosci* 31: 8654-8658, 2011.
- 1173 **Komban SJ, Kremkow J, Jin J, Wang Y, Lashgari R, Li X, Zaidi Q, and Alonso**  
1174 **JM.** Neuronal and perceptual differences in the temporal processing of darks and  
1175 lights. *Neuron* 82: 224-234, 2014.
- 1176 **Laubrock J, Engbert R, and Kliegl R.** Microsaccade dynamics during covert  
1177 attention. *Vision Res* 45: 721-730, 2005.
- 1178 **Lu ZL, and Sperling G.** Black-white asymmetry in visual perception. *J Vis* 12: 8,  
1179 2012.
- 1180 **Malevich T, Buonocore A, and Hafed ZM.** Rapid stimulus-driven modulation of  
1181 slow ocular position drifts. *BioRxiv* 2020.
- 1182 **Maris E, and Oostenveld R.** Nonparametric statistical testing of EEG- and MEG-  
1183 data. *J Neurosci Methods* 164: 177-190, 2007.
- 1184 **Mele S, Savazzi S, Marzi CA, and Berlucchi G.** Reaction time inhibition from  
1185 subliminal cues: is it related to inhibition of return? *Neuropsychologia* 46: 810-819,  
1186 2008.
- 1187 **Nichols Z, Nirenberg S, and Victor J.** Interacting linear and nonlinear  
1188 characteristics produce population coding asymmetries between ON and OFF cells in  
1189 the retina. *J Neurosci* 33: 14958-14973, 2013.
- 1190 **Pastukhov A, and Braun J.** Rare but precious: microsaccades are highly  
1191 informative about attentional allocation. *Vision Res* 50: 1173-1184, 2010.
- 1192 **Peel TR, Hafed ZM, Dash S, Lomber SG, and Corneil BD.** A Causal Role for the  
1193 Cortical Frontal Eye Fields in Microsaccade Deployment. *PLoS Biol* 14: e1002531,  
1194 2016.
- 1195 **Posner MI.** Orienting of attention. *Q J Exp Psychol* 32: 3-25, 1980.
- 1196 **Posner MI, and Cohen Y.** Components of visual orienting. In: *Attention and*  
1197 *Performance X*, edited by Bouma H, and Bowhuis D. Hillsdale, NJ: Erlbaum, 1984, p.  
1198 531-556.

- 1199 **Reingold EM, and Stampe DM.** Saccadic inhibition in complex visual tasks. In:  
1200 *Current Oculomotor Research*, edited by Becker W, Deubel H, and Mergner T.  
1201 Boston: Springer, 1999, p. 249-255.
- 1202 **Reingold EM, and Stampe DM.** Saccadic inhibition in reading. *J Exp Psychol Hum*  
1203 *Percept Perform* 30: 194-211, 2004.
- 1204 **Reingold EM, and Stampe DM.** Saccadic inhibition in voluntary and reflexive  
1205 saccades. *J Cogn Neurosci* 14: 371-388, 2002.
- 1206 **Reingold EM, and Stampe DM.** Using the saccadic inhibition paradigm to  
1207 investigate saccadic control in reading. In: *The mind's eye: cognitive and applied*  
1208 *aspects of eye movement research*, edited by Hyona J, Radach R, and Deubel H.  
1209 Amsterdam: North Holland, 2003, p. 347-360.
- 1210 **Reuter-Lorenz PA, Jha AP, and Rosenquist JN.** What is inhibited in inhibition of  
1211 return? *J Exp Psychol Hum Percept Perform* 22: 367-378, 1996.
- 1212 **Rolfs M.** Microsaccades: small steps on a long way. *Vision Res* 49: 2415-2441,  
1213 2009.
- 1214 **Rolfs M, Kliegl R, and Engbert R.** Toward a model of microsaccade generation: the  
1215 case of microsaccadic inhibition. *J Vis* 8: 5 1-23, 2008.
- 1216 **Scholes C, McGraw PV, Nystrom M, and Roach NW.** Fixational eye movements  
1217 predict visual sensitivity. *Proc Biol Sci* 282: 20151568, 2015.
- 1218 **Skinner J, Buonocore A, and Hafed ZM.** Transfer function of the rhesus macaque  
1219 oculomotor system for small-amplitude slow motion trajectories. *J Neurophysiol* 121:  
1220 513-529, 2019.
- 1221 **Tian X, Yoshida M, and Hafed ZM.** Dynamics of fixational eye position and  
1222 microsaccades during spatial cueing: the case of express microsaccades. *J*  
1223 *Neurophysiol* 119: 1962-1980, 2018.
- 1224 **Tian X, Yoshida M, and Hafed ZM.** A Microsaccadic Account of Attentional Capture  
1225 and Inhibition of Return in Posner Cueing. *Frontiers in systems neuroscience* 10: 23,  
1226 2016.
- 1227 **Valsecchi M, Betta E, and Turatto M.** Visual oddballs induce prolonged  
1228 microsaccadic inhibition. *Exp Brain Res* 177: 196-208, 2007.

- 1229 **Westner BU, and Dalal SS.** Faster than the brain's speed of light: Retinocortical  
1230 interactions differ in high frequency activity when processing darks and lights.  
1231 *BioRxiv* 2019.
- 1232 **White AL, and Rolfs M.** Oculomotor inhibition covaries with conscious detection. *J*  
1233 *Neurophysiol* 116: 1507-1521, 2016.
- 1234 **Wright RD, and Richard CM.** Sensory mediation of stimulus-driven attentional  
1235 capture in multiple-cue displays. *Percept Psychophys* 65: 925-938, 2003.
- 1236 **Xing D, Yeh CI, and Shapley RM.** Generation of black-dominant responses in V1  
1237 cortex. *J Neurosci* 30: 13504-13512, 2010.
- 1238 **Yeh CI, Xing D, and Shapley RM.** "Black" responses dominate macaque primary  
1239 visual cortex v1. *J Neurosci* 29: 11753-11760, 2009.
- 1240 **Yoshida M, and Hafed ZM.** Microsaccades in blindsight monkeys (Abstract). *Journal*  
1241 *of Vision* 17: 896, 2017.
- 1242 **Zhao Y, and Heinke D.** What causes IOR? Attention or perception? - manipulating  
1243 cue and target luminance in either blocked or mixed condition. *Vision Res* 105: 37-  
1244 46, 2014.  
1245
- 1246
- 1247
